RESEARCH

# CleanRecomb, a quick tool for recombination detection in SNP based cluster analysis

Mark Østerlund and Kristoffer Kiil\*

\*Correspondence: [krki@ssi.dk](mailto:krki@ssi.dk)  
Unit of Foodborne Infections,  
Statens Serum Institut, Artillerivej  
5, DK-2300 Copenhagen,  
Denmark  
Full list of author information is  
available at the end of the article

## Abstract

We present CleanRecomb, a tool to quickly filter a SNP matrix for likely recombination events.

## Method:

The method evaluates segments with identical SNP profiles over the genome, based on the assumption that SNPs in the absence of recombination events are uniformly distributed across the genome. The method is evaluated on a set of 9 ST200 *E. coli* genome sequences.

## Results:

The detected recombination events coincide with regions of elevated SNP density.

**Keywords:** recombination; SNP; public health

## Introduction

In public health microbiology, the low cost of DNA sequencing has made inference of phylogeny of closely related strains a routine analysis for outbreak detection of bacterial pathogens. Inference of phylogeny using Single Nucleotide Polymorphism (SNP) can be severely distorted by recombination events either between strains within the dataset, or with an unobserved strain. We introduce CleanRecomb, a tool for filtering out spurious SNP events caused by recombination events. CleanRecomb functions under the assumption that mutations giving rise to SNPs are uniformly distributed over the genome, while apparent SNPs caused by recombination events will be located in a bounded region.

Code is available at <https://github.com/ssi-dk/CleanRecomb>.

## Method

CleanRecomb takes as input a SNP alignment, with the SNPs ordered by genome position (or by contig position in case of a draft reference genome). Seeing the input alignment as an ordered strain x SNP matrix, each column in the matrix is assigned a profile based on the relative conserved/nonconserved status of each strain. These column profiles are made by iterating through the column and comparing the current base to the previous, condensing the column to a repetition list string for each nucleotide. For example AAATTAACA would be encoded to “3:1,2:2,2:1,1:3,1:1”, as would CCCAACCTC. Note that nucleotides are changed to the index of their occurrence in the current profile. Thus the profile expresses an ordered pattern of relatedness for the sequences in the alignment. Identical profiles result in identical hash values, thus recurring patterns can be counted. We denote a set of adjacent

columns with identical profiles as a segment, and a segments likelihood of occurring can be calculated as follows:

$$N_{\text{segments}} \left( \frac{n_{\text{profile}}}{l_{\text{alignment}}} \right)^{l_{\text{segment}} - 1}$$

Where  $N_{\text{segments}}$  is the total number of segments,  $n_{\text{profile}}$  is the number of occurrences of a given profile,  $l_{\text{alignment}}$  is the number of positions in the SNP matrix, and  $l_{\text{segment}}$  is the length of the current segment with identical SNP profiles.

Segments are evaluated in order of decreasing length, comparing the above statistic to an  $\alpha$  of 0.05. If a segment fails the threshold, it is marked as a recombination event, and joined into a single point for SNP purposes. Since large recombination events may inflate profile counts and the overall alignment length, both of those are reduced by the size of the discarded segment, and  $N(\text{segments})$  is decremented by one, before the next segments are processed. It should be noted that since the input is an alignment of SNPs each position will contain mutations which nullifies any rate of mutation consideration since it would be 100%, thus the simple likelihood model.

## Results

To show an example of the impact CleanRecomb can have we have analysed a set of 9 ST200 *E. coli* sequences using our internal SNP pipeline (<https://github.com/PHWGS/ssi-snp-pipeline>) and present the maximum parsimony phylogeny before and after applying CleanRecomb.

ST200 shows phylogenetic differences, mainly the 1610T26643 and 1609F54046 branch joins the larger branch. Notably the overall distance of the tree is significantly lowered, indicated by the scale going from 100 to 40 SNPs. As a sanity check for how CleanRecomb marks SNP regions as recombination event we have extracted the SNPmatrix obtained and marked the positions that are filtered.

In Figure 2 the distribution of recombination marked positions can be seen with the relative density of SNP positions on the contig. Density of SNP positions is set as the number of SNPs in  $\pm 1000\text{bp}$  from the current, scaled to the highest count observed. It can be seen that recombination and high density mostly coincide. Exceptions include cases such as contig 57 and contig 68, in both cases the entire contig is marked as a single event with low density, this is likely due to plasmid differences or sub-type phylogeny.

## Discussion

If one or more strains have SNPs from random mutation events in the middle of a recombination region the region will be separated into several smaller regions, lowering the power to detect the recombination event. An example of this is contig 29 in Figure 2.

When analyzing closely related strains, the impact is small. If a deep branching strain is included in the analysis, however, this will significantly impact the performance of this method.

Future perspectives: Combining adjacent segments into supersegments might offset the above weakness. Alternatively a sliding window could be used, testing for overrepresented patterns against the binomial distribution.

## Conclusion

Recombination detection is demonstrated to mainly detect regions with a high density of SNPs. While this implementation is aggressively marking SNPs as recombination events it is a useful tool for efficient recombination filtering during SNP analysis as part of pathogen surveillance.

## Competing interests

The authors declare that they have no competing interests.

## Author's contributions

Kristoffer Kiil created the algorithm and implemented it in python. Mark Østerlund evaluated the method and drafted the manuscript. All authors proofed the manuscript.

## Figures

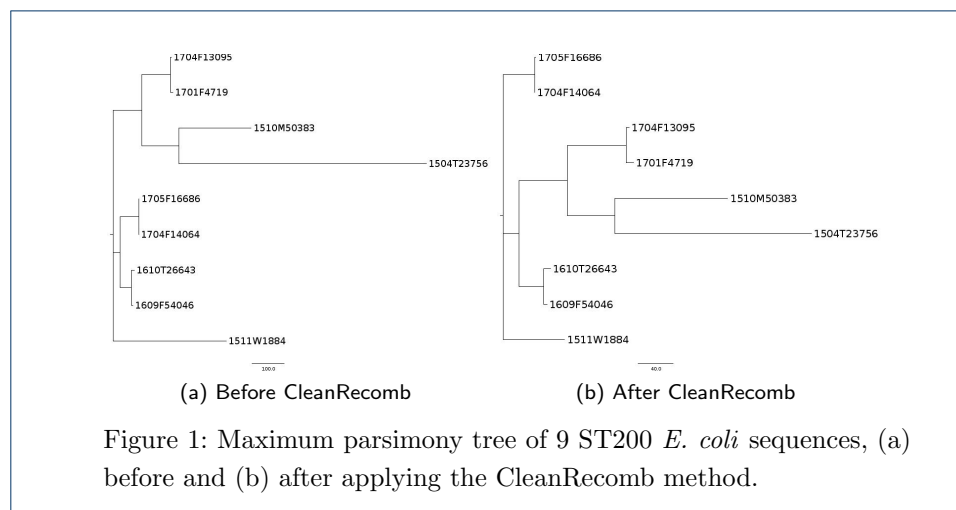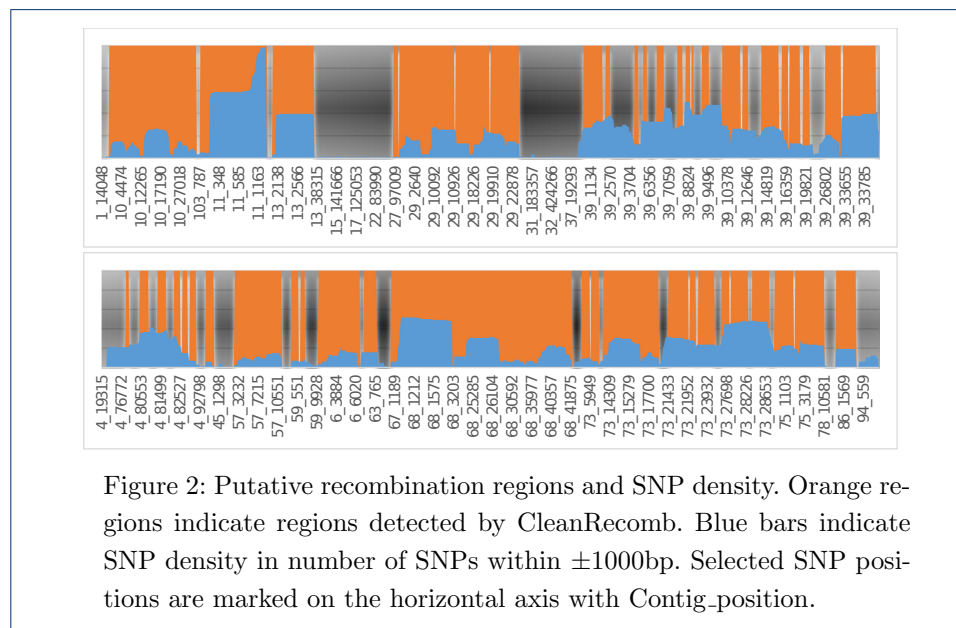

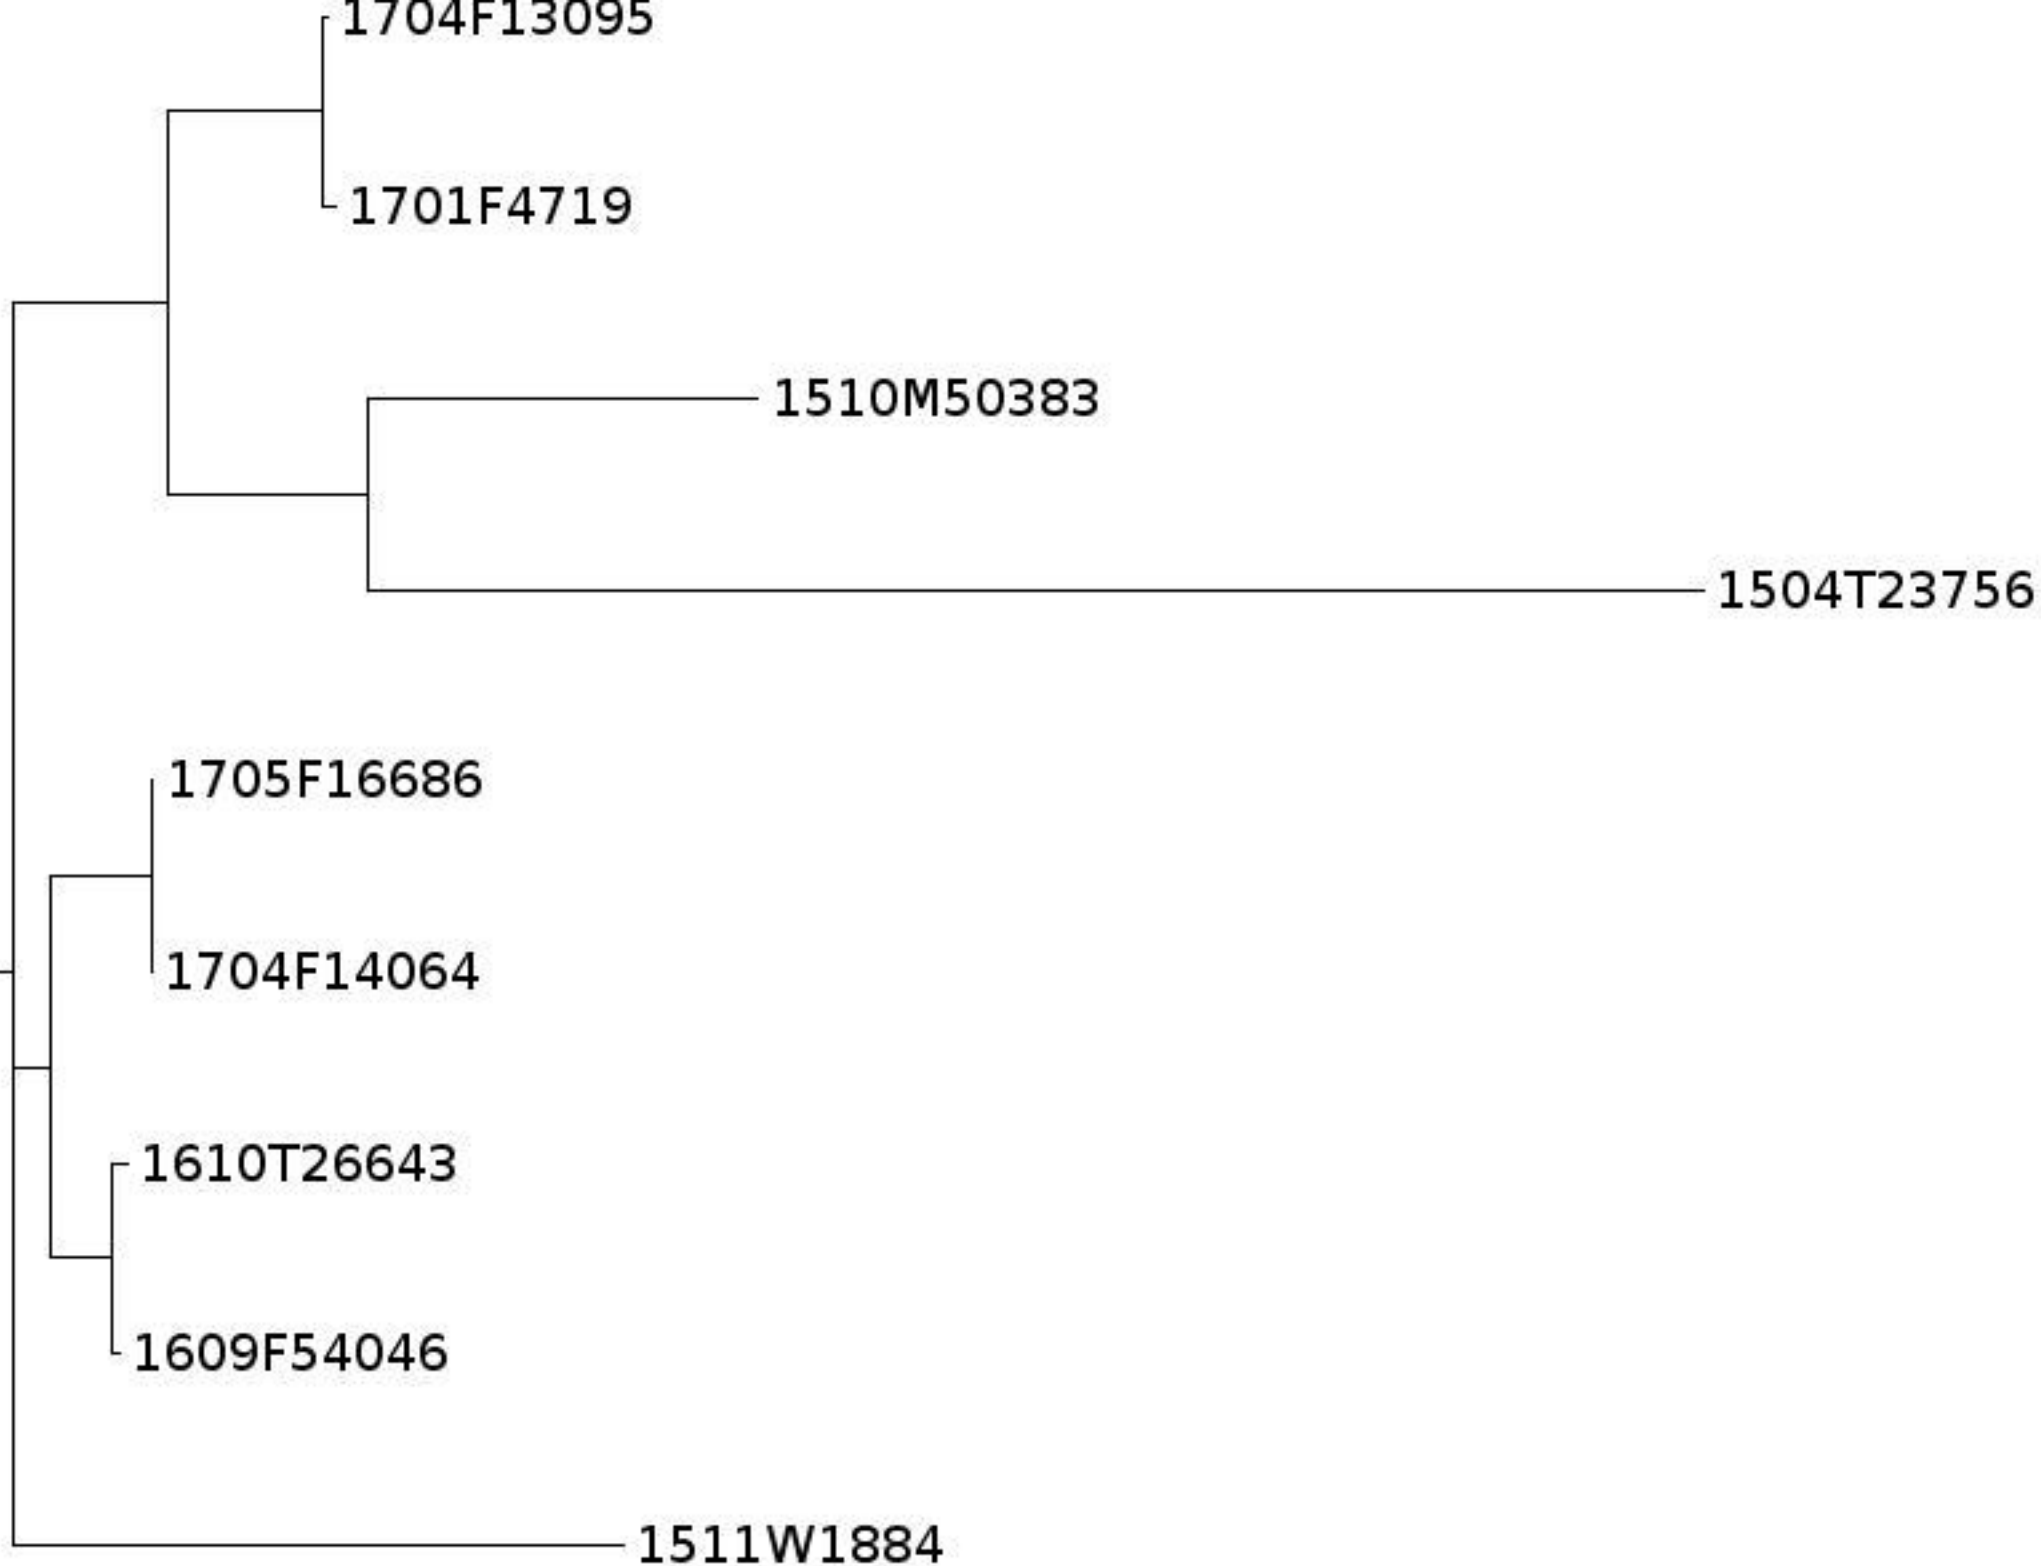

100.0

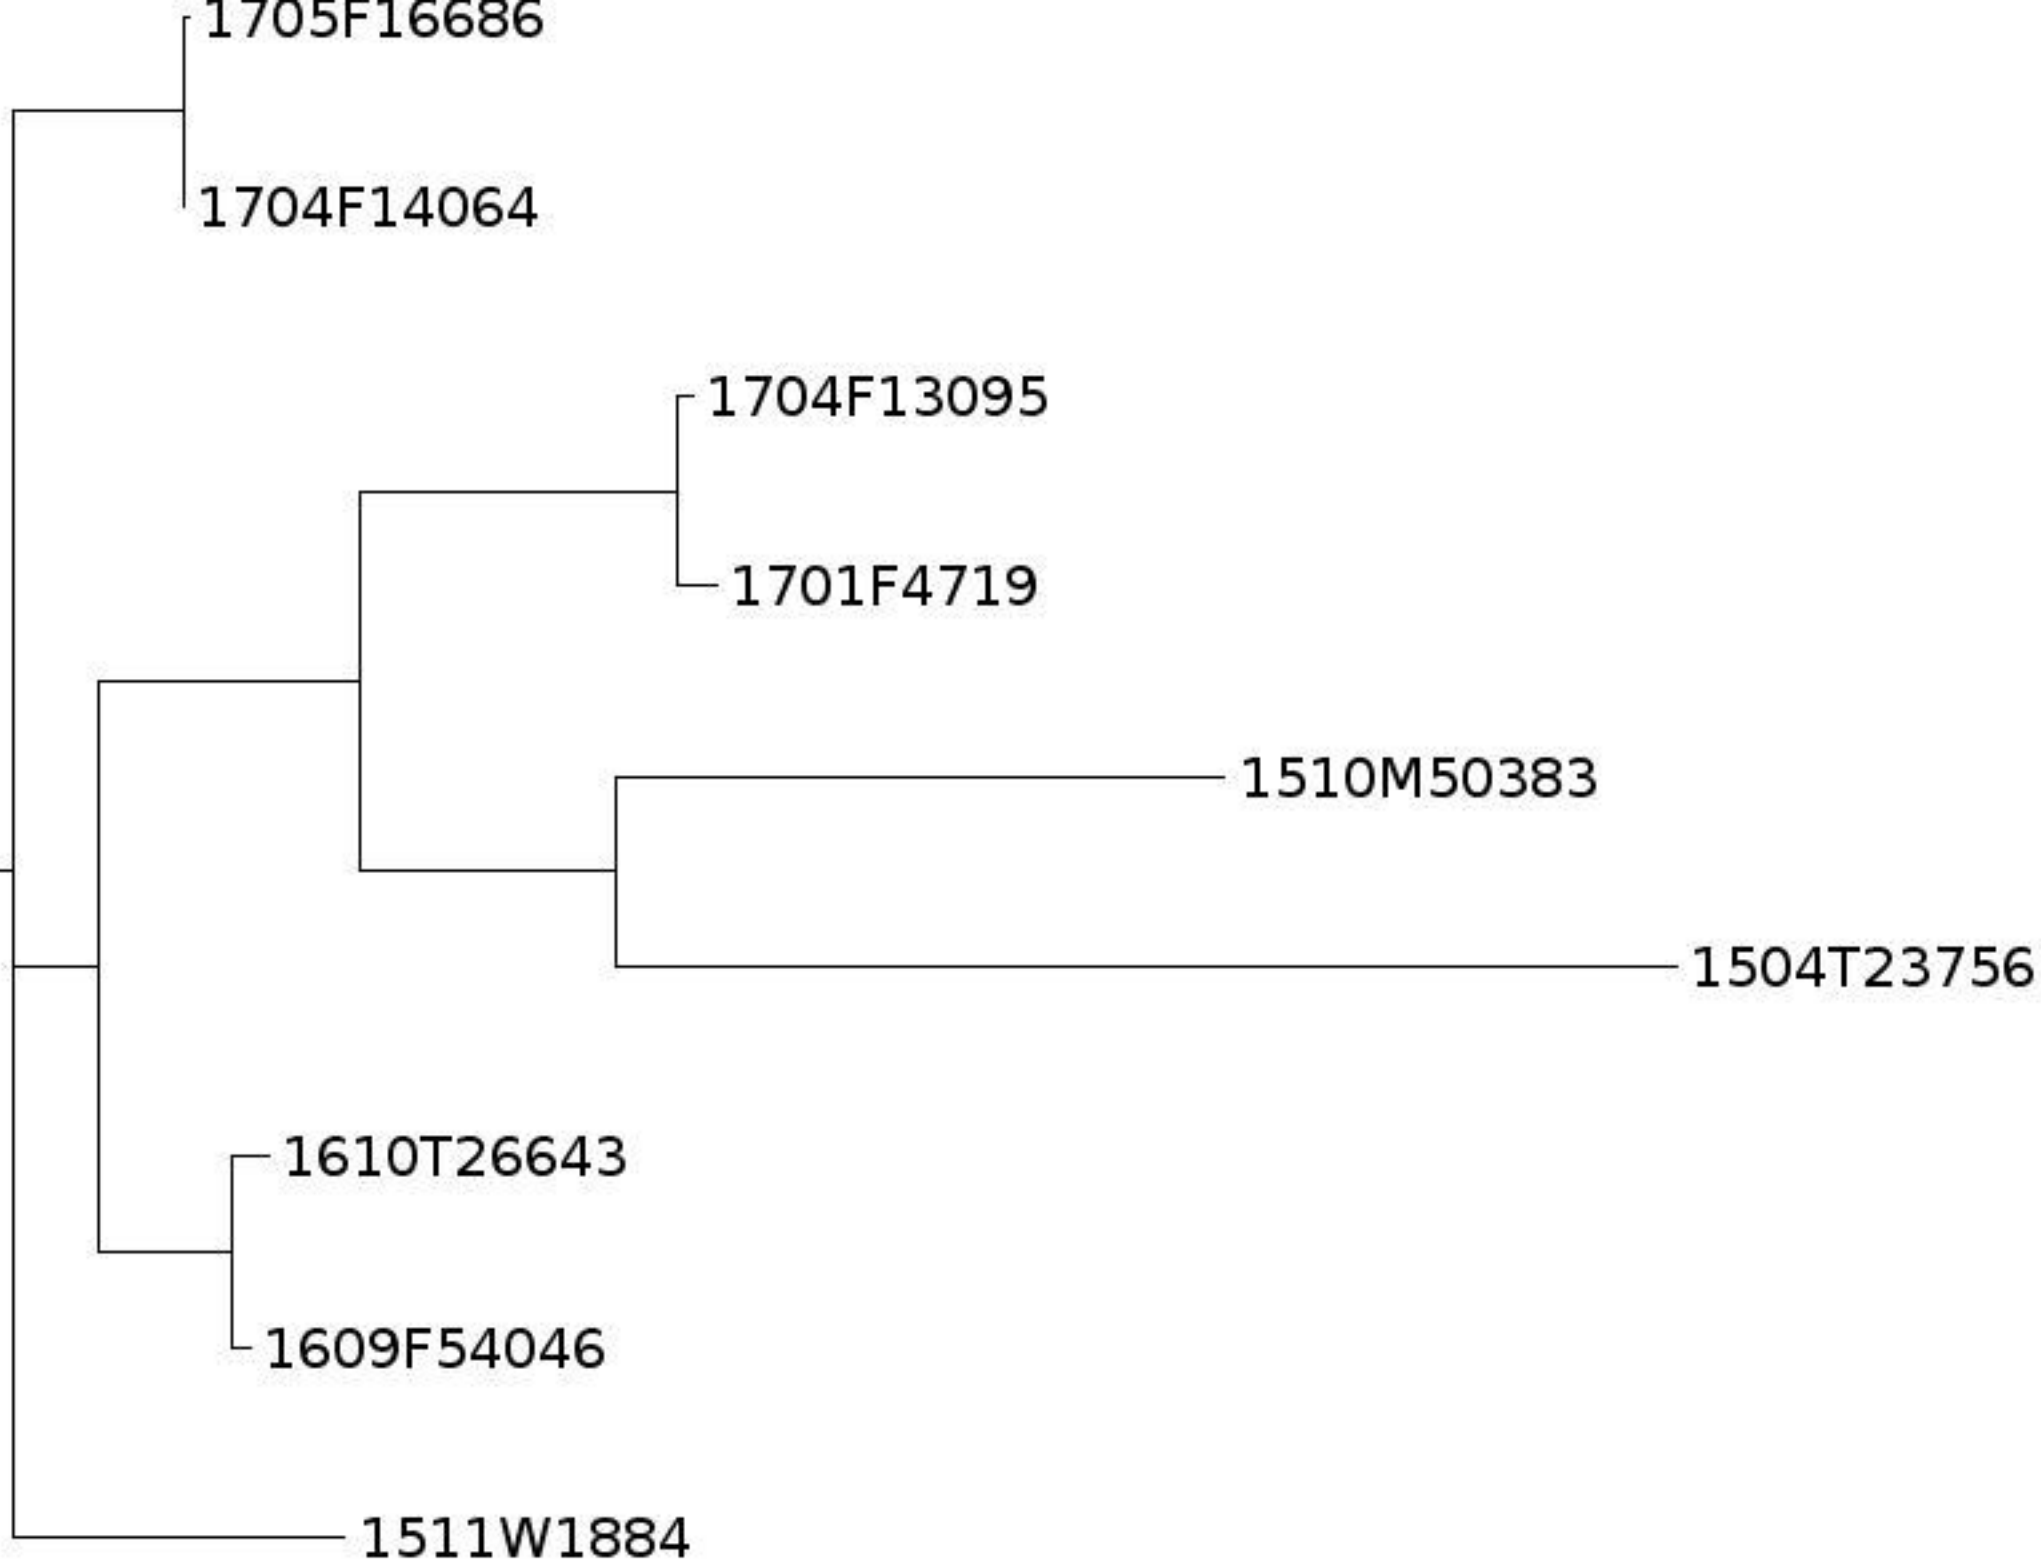

40.0

1\_14048  
10\_4474  
10\_12265  
10\_17190  
10\_27018  
103\_787  
11\_348  
11\_585  
11\_1163  
13\_2138  
13\_2566  
13\_38315  
15\_141666  
17\_125053  
22\_83990  
27\_97009  
29\_2640  
29\_10092  
29\_10926  
29\_18226  
29\_19910  
29\_22878  
31\_183357  
32\_424266  
37\_19293  
39\_1134  
39\_2570  
39\_3704  
39\_6356  
39\_7059  
39\_8824  
39\_9496  
39\_10378  
39\_12646  
39\_14819  
39\_16359  
39\_19821  
39\_26802  
39\_33655  
39\_33785

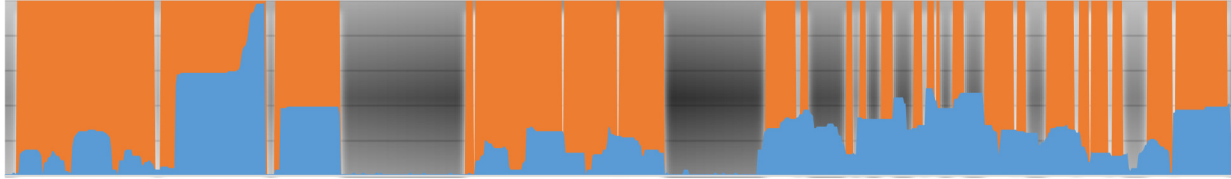

4\_19315  
4\_76772  
4\_80553  
4\_81499  
4\_82527  
4\_92798  
45\_1298  
57\_3232  
57\_7215  
57\_10551  
59\_551  
59\_9928  
6\_3884  
6\_6020  
63\_765  
67\_1189  
68\_1212  
68\_1575  
68\_3203  
68\_25285  
68\_26104  
68\_30592  
68\_35977  
68\_40357  
68\_41875  
73\_5949  
73\_14309  
73\_15279  
73\_17700  
73\_21433  
73\_21952  
73\_23932  
73\_27698  
73\_28226  
73\_28653  
75\_1103  
75\_3179  
78\_10581  
86\_1569  
94\_559

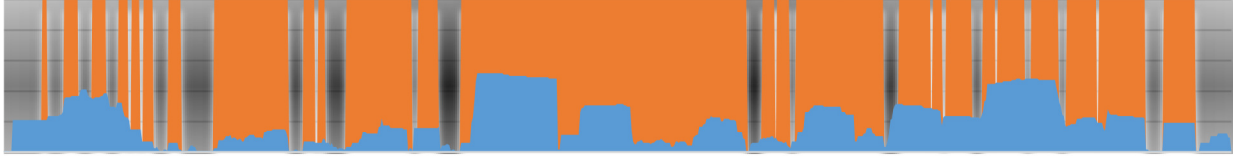

Source: http://biorxiv.org/content/10.1101/317131v1.full.pdf
